# Supplementary material for: Computer simulations of the adsorption of an N-terminal peptide of statherin, SN15, and its mutants on hydroxyapatite surfaces
Source: Royal Society of Chemistry journal article supplement (doi:10.1039/c9cp01638d), 2019-01-01
Supplement: c9cp01638d1.pdf [file c9cp01638d1.pdf]

Electronic Supplementary Information for  
**Computer Simulations of N-terminal Peptide of  
Statherin, SN15 and Its Mutants Adsorption on  
Hydroxyapatite Surfaces**

Muzhong Luo<sup>\*a</sup>, Yuan Gao<sup>†b,c</sup>, Shengjiang Yang<sup>a</sup>, Xuebo Quan<sup>a</sup>, Delin Sun<sup>a</sup>,

Kunneng Liang<sup>b,c</sup>, Jiyao Li<sup>\*b,c</sup>, Jian Zhou<sup>\*a</sup>

<sup>a</sup>Guangdong Provincial Key Lab for Green Chemical Product Technology, School of Chemistry  
and Chemical Engineering, South China University of Technology, Guangzhou, Guangdong  
510640, People's Republic of China

<sup>b</sup>State Key Laboratory of Oral Diseases, West China Hospital of Stomatology, Sichuan  
University, Chengdu 610041, China

<sup>c</sup>Department of Operative Dentistry and Endodontics, West China Hospital of Stomatology,  
Sichuan University, Chengdu 610041, China

**Table S1:** Full sequences of SN series peptides.

| Peptide            | Sequence             | Note                      |
|--------------------|----------------------|---------------------------|
| SN15               | D-pS-pS-EEKFLRRIGRFG | pS denotes phosphoserines |
| SN <sub>S</sub> 15 | DSSEKFLRRIGRFG       | S denotes serine          |
| SN <sub>A</sub> 15 | DDDEEKFLRRIGRFG      | D denotes aspartic acid   |

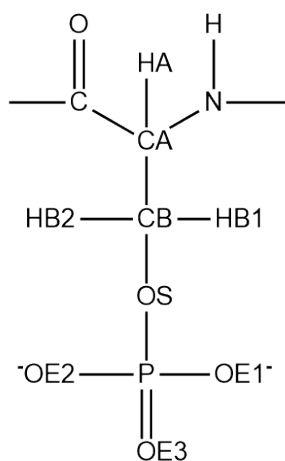**Figure S1:** Structure and atom names of phosphoserines. The atom names, bonds, angles and dihedrals were used corresponding to the Amber99sb-ildn parameter set.**Table S2:** Atom types and partial charges of each atom in phosphoserines, adopted from the reference.<sup>1</sup>

| Atom name | Atom type | Charge    |
|-----------|-----------|-----------|
| C         | C         | 0.557437  |
| O         | O         | -0.629560 |
| CA        | CT        | -0.278702 |
| HA        | H1        | 0.198553  |
| CB        | CT        | 0.253803  |
| HB1       | H1        | 0.043230  |
| HB2       | H1        | 0.043230  |
| OS        | OS        | -0.430343 |
| P         | P         | 1.387087  |
| OE1       | O2        | -0.982953 |
| OE2       | O2        | -0.982953 |
| OE3       | O2        | -0.982953 |
| N         | N         | -0.481860 |
| H         | H         | 0.285984  |

The HAP force field parameters used in this work was developed by Hauptmann et al.<sup>2</sup>. This force field reproduced the experimental bulk crystal parameters with high accuracy (e.g., within less than 1% deviation for a wide range of temperatures between 73 and 1273K)<sup>2</sup>; therefore, the force field has been adopted extensively in various HAP-simulation studies<sup>3-7</sup>. In Hauptmann et al.'s original formulation, the intermolecular interactions between the ionic groups in HAP was described as a summation of Coulombic and Born-Mayer-Huggins (BMH) potentials for electrostatic and van der Waals interactions. In our previous work, we have fitted it into Lennard-Jones potential (see Table S3) to be compatible with GROMACS' force field<sup>3</sup>. These force field parameters has been evaluated by our previous work<sup>3</sup>. Here, we also reevaluated them through MD simulation in NPT ensemble.

The system contains 4×3×5 HAP crystal units in a periodic box. Cutoff distance of 1.3 nm was adopted for short-range non-bonded forces. Bonds were constrained by the LINCS algorithm<sup>8</sup>. Particle Mesh Ewald (PME)<sup>9</sup>, V-rescale<sup>10</sup> and Parrinello-Rahman<sup>11</sup> methods were used. The simulation ran 3 ns in NPT ensemble. At 310 K, the Lennard-Jones parameters provide a bulk crystal lattice parameters average deviation of 0.8% (see Table S4), which means that the force field well reproduces the structure properties of HAP.

**Table S3:** Partial charges<sup>2</sup> and VDW parameters<sup>12</sup> for HAP surface.

| Atom  | Charge (e) | $\epsilon$ (kJ·mol <sup>-1</sup> ) | $\sigma$ (nm) |
|-------|------------|------------------------------------|---------------|
| Ca    | +2.0       | 0.49635                            | 0.29413       |
| P     | +2.6       | 4.07547                            | 0.34857       |
| O (P) | -1.4       | 1.05441                            | 0.30325       |
| O (H) | -1.6       | 0.48965                            | 0.30929       |
| H     | +0.6       | 0.00004                            | 0.14042       |

**Table S4:** Simulated and experimental<sup>13</sup> HAP unit cell parameters at 310K.

|              | a (nm) | b (nm) | c (nm) | $\alpha$ | $\beta$ | $\gamma$ |
|--------------|--------|--------|--------|----------|---------|----------|
| Simulation   | 0.9351 | 0.9351 | 0.6830 | 90       | 90      | 120      |
| Experimental | 0.9423 | 0.9423 | 0.6883 | 90       | 90      | 120      |

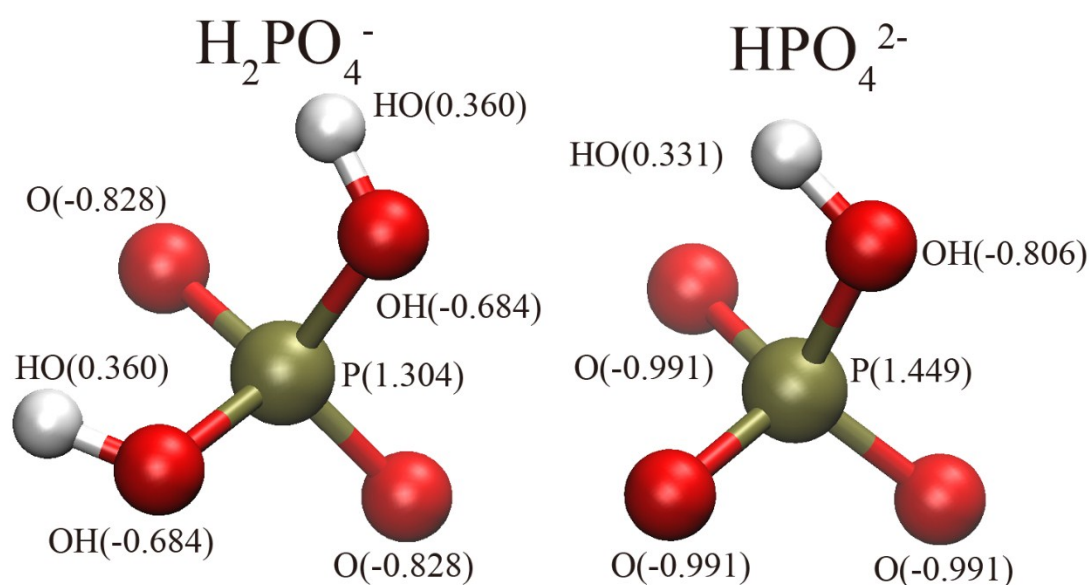

**Figure S2:** Amber99sb-ildn atom types and fractional charges assigned to each atom in phosphate ions. The charges are obtained from a structure optimized in gas phase at the HF/6-31G\* level; atoms of the same type are restrained to have identical charges. Charge assignment for dihydrogen phosphate is adopted from reference.<sup>14</sup> The atom type, bonds, angles and dihedrals were taken from existing parameters in the Amber99sb-ildn force field.

**Table S5:** Setting for all simulated systems.

| Peptide            | Solution environment | Ca <sup>2+</sup> (M) | H <sub>2</sub> PO <sub>4</sub> <sup>-</sup> /<br>HPO <sub>4</sub> <sup>2-</sup> (M) | Na <sup>+</sup> /Cl <sup>-</sup> (M) | No. of water molecules |
|--------------------|----------------------|----------------------|-------------------------------------------------------------------------------------|--------------------------------------|------------------------|
| SN15               | NaCl                 | 0                    | 0/0                                                                                 | 13/10<br>(0.12)                      | 3286                   |
|                    | Ca/P                 | 10<br>(0.12)         | 3/3 (0.07<br>2)                                                                     | 0/8<br>(0)                           | 3308                   |
| SN <sub>A</sub> 15 | NaCl                 | 0                    | 0/0                                                                                 | 11/10<br>(0.12)                      | 3288                   |
|                    | Ca/P                 | 10<br>(0.12)         | 3/3<br>(0.072)                                                                      | 0/10<br>(0)                          | 3310                   |
| SN <sub>S</sub> 15 | NaCl                 | 0                    | 0/0                                                                                 | 10/11<br>(0.12)                      | 3287                   |
|                    | Ca/P                 | 10<br>(0.12)         | 3/3<br>(0.072)                                                                      | 0/12<br>(0)                          | 3315                   |

An orientation angle ( $\theta$ ) was applied to quantitatively characterize the orientation of adsorbed peptides on HAP surfaces, as revealed in Fig.S3, which is defined as the angle between the unit vector along the dipole of a protein and a vector perpendicular to the HAP surface and passing through the centre of mass of the peptide according to our previous work<sup>3, 15, 16</sup>. We've calculated the cosine value of this angle ( $\cos \theta$ ) to represent the orientation of adsorbed peptides, which has been illustrated in Fig. S4.

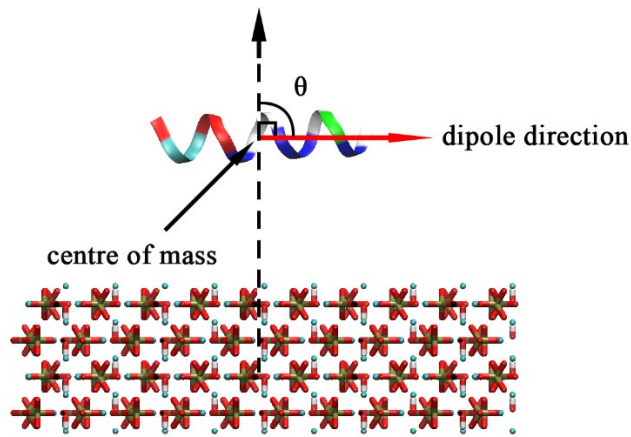

**Fig. S3:** The definition of orientation of peptide among the HAP surface.  $\theta$  is the angle between the unit vector along the dipole of a protein and a vector perpendicular to the HAP surface and passing through the centre of mass of the peptide.

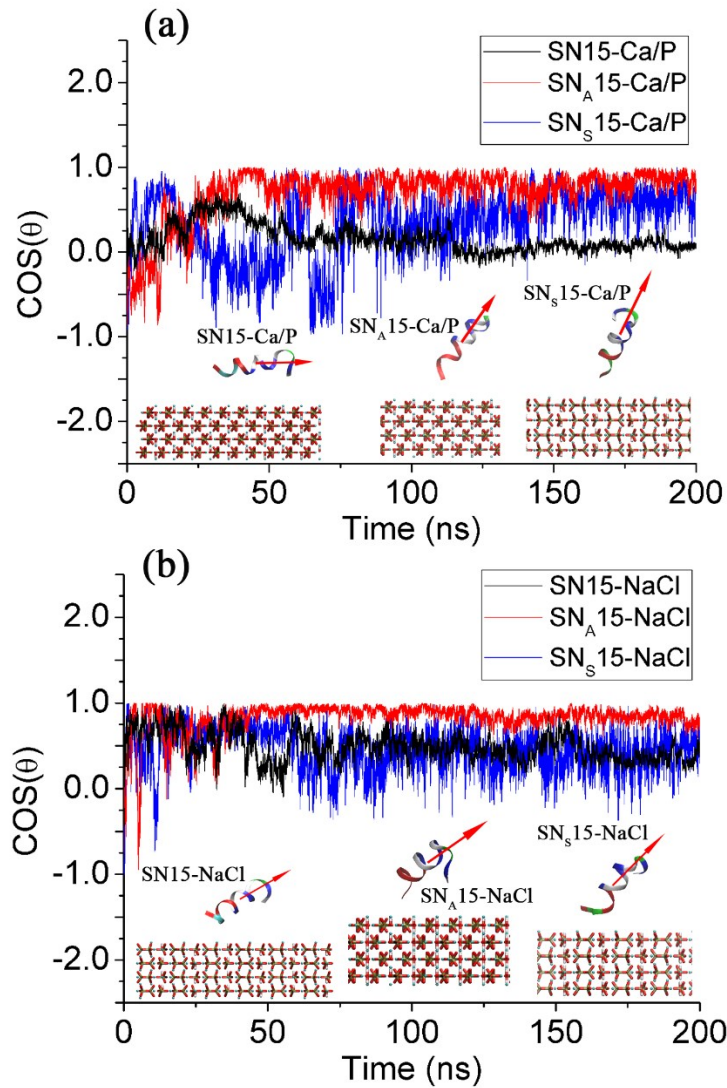

**Fig. S4:** Orientation of three kinds of peptides in (a) Ca/P solution and (b) NaCl solution. Insets: Illustration of the orientation of each system.

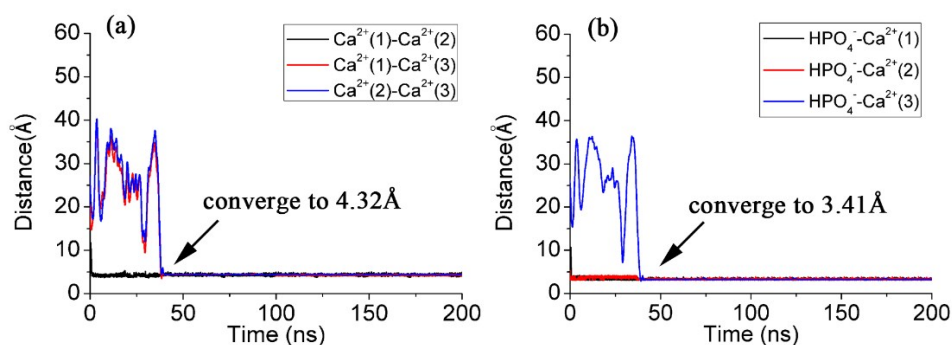

**Fig. S5:** We named three calcium ions that involved in “(Sep3-PO<sub>4</sub><sup>2-</sup>)-3Ca<sup>2+</sup>-HPO<sub>4</sub><sup>-</sup> structure” as Ca<sup>2+</sup>(1), Ca<sup>2+</sup>(2) and Ca<sup>2+</sup>(3), then we calculated (a) the distance between 3 Ca<sup>2+</sup> ions, and (b) the distance between HPO<sub>4</sub><sup>-</sup> ions and them. As can be seen, each distance has converged.

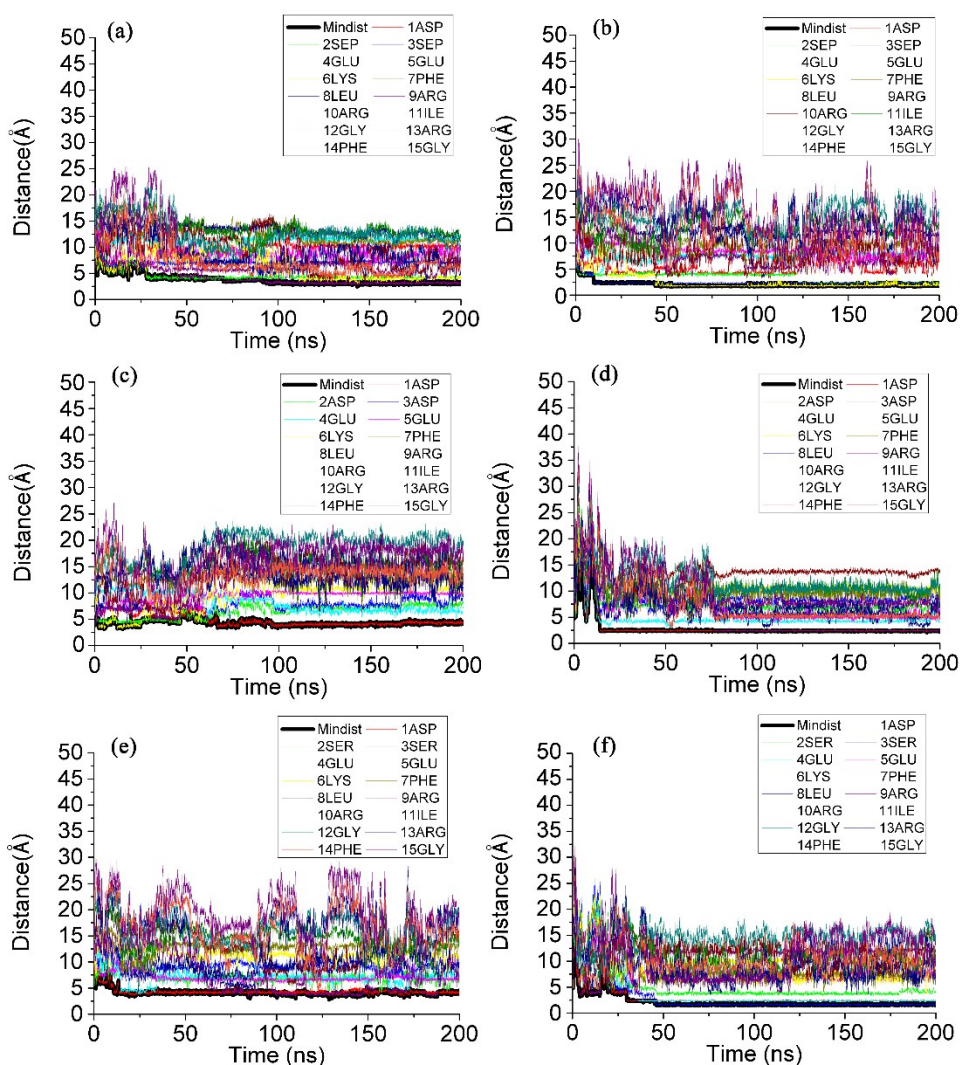

**Fig. S6:** Minimum distance for (a) SN<sub>15</sub> peptide in Ca/P solution, (b) SN<sub>15</sub> peptide in NaCl solution, (c) SN<sub>A</sub>15 peptide in Ca/P solution, (d) SN<sub>A</sub>15 peptide in NaCl solution, (e) SN<sub>S</sub>15 peptide in Ca/P solution and (f) SN<sub>S</sub>15 peptide in NaCl solution and their each amino acid to the HAP surface.

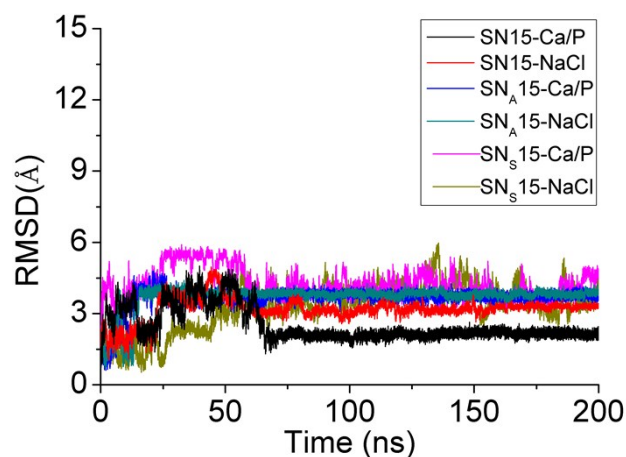

**Fig. S7:** Backbone RMSD function of three peptides in Ca/P and NaCl solutions during 200 ns simulations.

1. N. Homeyer, A. H. C. Horn, H. Lanig and H. Sticht, *J Mol Model*, 2006, **12**, 281.
2. S. Hauptmann, H. Dufner, J. Brickmann, S. M. Kast and R. S. Berry, *Phys Chem Chem Phys*, 2003, **5**, 635.
3. C. Liao, Y. Xie and J. Zhou, *Rsc Adv*, 2014, **4**, 15759.
4. Z. Xu, Y. Yang, Z. Wang, D. Mkhonto, C. Shang, Z. P. Liu, Q. Cui and N. Sahai, *J Comput Chem*, 2014, **35**, 70-81.
5. H. Pan, J. Tao, X. Xu and R. Tang, *Langmuir*, 2007, **27**, 8972.
6. D. Zahn and O. Hochrein, *Phys Chem Chem Phys*, 2003, **5**, 4004.
7. E. L. Buckle, A. Prakash, M. Bonomi, J. Sampath, J. Pfaendtner and G. P. Drobny, *J Am Chem Soc*, 2019, **141**, 1998-2011.
8. B. Hess, H. Bekker, H. J. C. Berendsen and J. G. E. M. Fraaije, *J Comput Chem*, 1997, **18**, 1463.
9. U. Essmann, L. Perera, M. L. Berkowitz, T. Darden, H. Lee and L. G. Pedersen, *J Chem Phys*, 1995, **103**, 8577.
10. G. Bussi, D. Donadio and M. Parrinello, *J Chem Phys*, 2007, **126**, 014101.
11. M. Parrinello and A. Rahman, *J. Appl. Phys.*, 1981, **52**, 7182-7190.
12. R. Bhowmik, K. S. Katti and D. Katti, *Polymer*, 2007, **48**, 664.
13. R. M. Willson, J. C. Elliott and S. E. P. Dowker, *Am Mineral*, 1999, **84**, 1406.
14. S. Kashefolgheta and A. Vila Verde, *Phys Chem Chem Phys*, 2017, **19**, 20593.
15. D. Zhao and J. Zhou, *Phys Chem Chem Phys*, 2017, **19**, 986-995.
16. C. Peng, J. Liu, D. Zhao and J. Zhou, *Langmuir*, 2014, **30**, 11401-11411.
